# Supplementary material for: A Simultaneous Extraction/Derivatization Strategy for Quantitation of Vitamin D in Dried Blood Spots Using LC–MS/MS: Application to Biomarker Study in Subjects Tested for SARS-CoV-2
Source: MDPI journal article supplement (doi:10.3390/ijms24065489), 2023-03-13
Supplement: s1 [file s1]

## Supplementary Files

### **A simultaneous extraction/derivatization strategy for quantitation of Vitamin D in Dried blood spots using LC-MS/MS: Application to biomarker study in Subjects Tested for SARS-CoV-2**

Yashpal S. Chhonker<sup>1, #</sup>, Nusrat Ahmed<sup>1, #</sup>, Christine M. Johnston<sup>2</sup>, Ruanne Barnabas<sup>3,4</sup>, Daryl J. Murry<sup>1, 5, Δ</sup>

<sup>1</sup>Clinical Pharmacology Laboratory, Department of Pharmacy Practice and Science, University of Nebraska Medical Center, Omaha, NE 68198, United States

<sup>2</sup>Department of Medicine, University of Washington, Seattle, WA

<sup>3</sup>Division of Infectious Diseases, Massachusetts General Hospital, Boston, MA

<sup>4</sup>Harvard Medical School, Boston, MA

<sup>5</sup>Fred and Pamela Buffett Cancer Center, University of Nebraska Medical Center, Omaha, NE 68198, United States.

# Authors contributed equally to this manuscript

Δ Corresponding author:

Daryl J. Murry, Pharm. D. (E-mail: [dj.murry@unmc.edu](mailto:dj.murry@unmc.edu))

Clinical Pharmacology Laboratory

Department of Pharmacy Practice and Science, College of Pharmacy

University of Nebraska Medical Center

Omaha, NE 68198-6025

Phone: 402-559-3790 (office), 402-559-2430 (lab)

**Table S1:** Summary of MS/MS parameters without 4-Phenyl-1,2,4-triazoline-3,5-dione (PTAD) derivatization: precursor ion, fragment ions, voltage potential (Q1), collision energy (CE) and voltage potential (Q3) for analytes.

| Analyte                    | MRM<br>(precursor/fragment ions) | Q1 (V) | CE (V) | Q3 (V) |
|----------------------------|----------------------------------|--------|--------|--------|
| 25(OH)D <sub>2</sub>       | 413.15>395.4                     | -15    | -11    | -15    |
| 25(OH)D <sub>3</sub>       | 401.15>383.4                     | -10    | -10    | -15    |
| Vitamin D <sub>2</sub>     | 397.3>69.1                       | -19    | -25    | -13    |
| Vitamin D <sub>3</sub>     | 385.3>367.4                      | -18    | -13    | -14    |
| d-3 vitamin D <sub>2</sub> | 400.35>69.1                      | -19    | -26    | -13    |
| d-6 25(OH)D <sub>3</sub>   | 407.2>389.4                      | -19    | -11    | -15    |

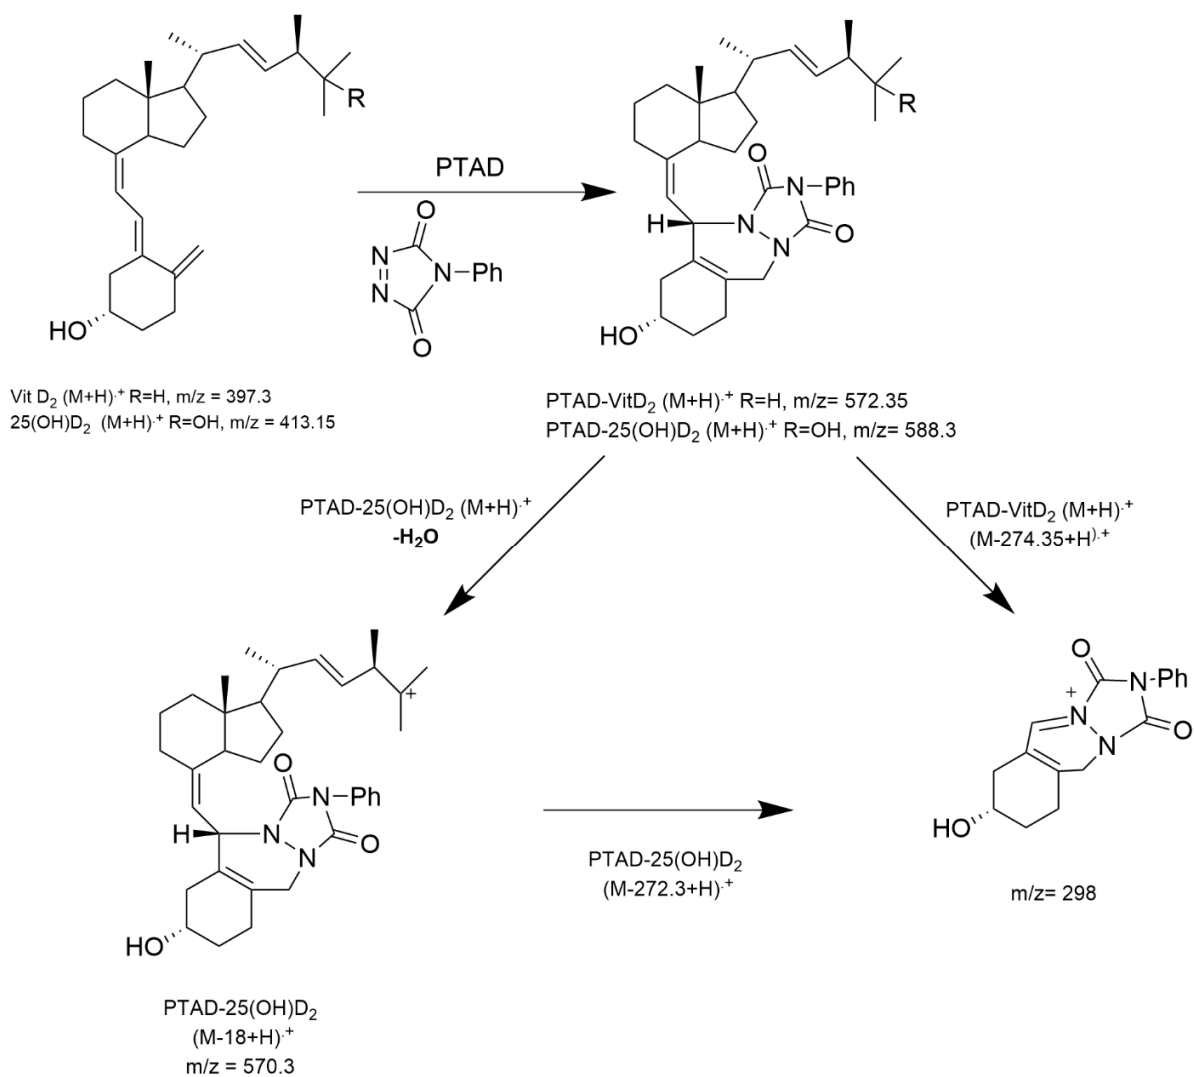

**Figure S1.** PTAD derivatization of vitamin D2 and 25(OH)D2 showing the PTAD-adduct ions at 572.35 and 588.3 respectively and the dehydrated precursor ions for 25(OH)D2 at 570.2.

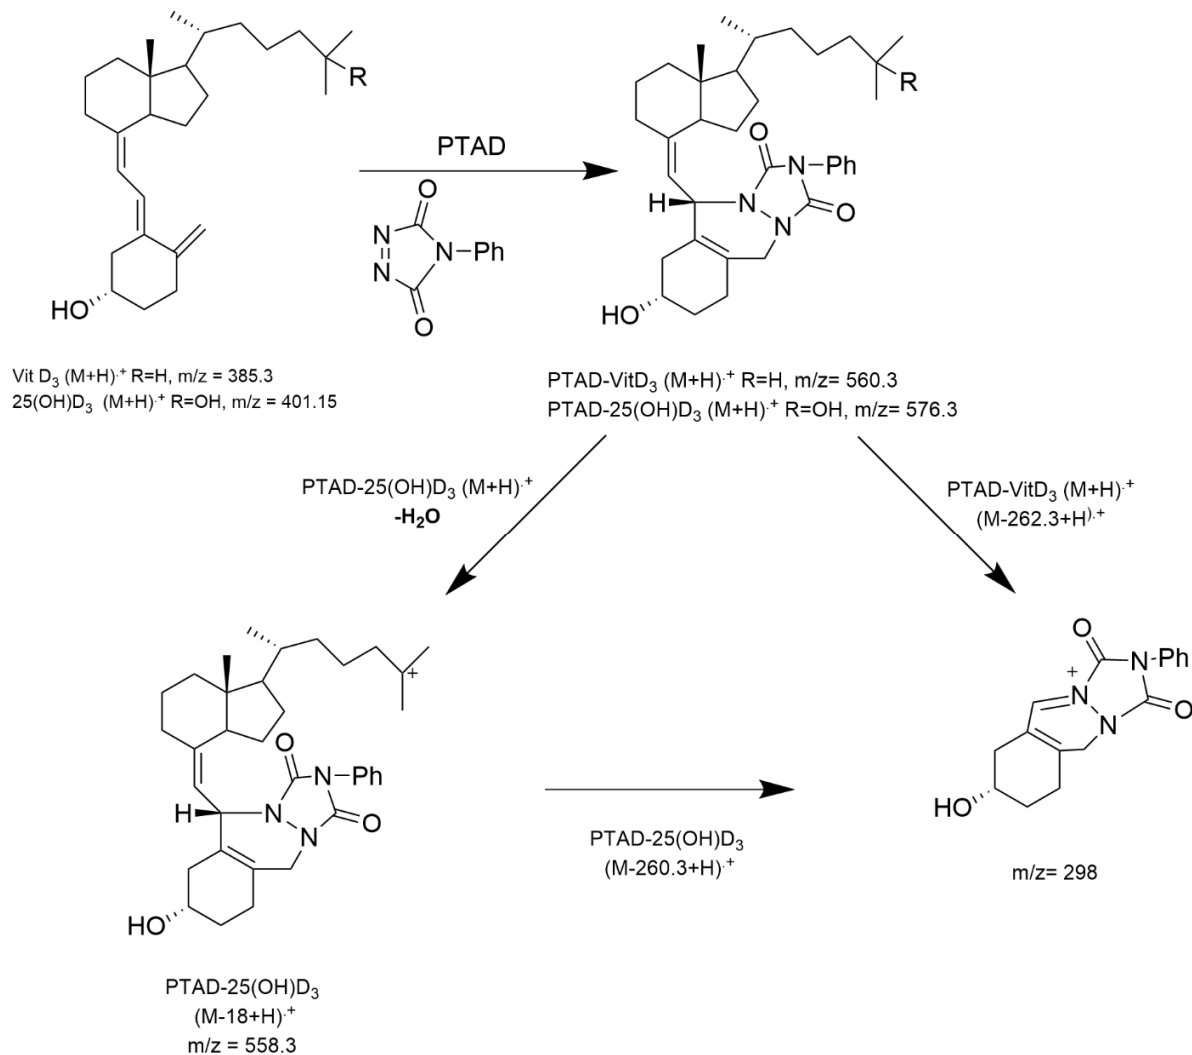

**Figure S2.** PTAD derivatization of vitamin D3 and 25(OH)D3 showing the PTAD-adduct ions at 560.3 and 576.3 respectively and the dehydrated precursor ions for 25(OH)D3 at 558.3.

Table S2: Summarizes the comparison of this method with previously reported LC-MS/MS methods related to the quantitation of vitamin D in Dried blood spots and human plasma.

| Method                        | Analytes                                         | Internal standard                  | Bio-matrix | Linearity (ng/mL) | Limit of detection (ng/mL) | Run time (min) | Ref. |
|-------------------------------|--------------------------------------------------|------------------------------------|------------|-------------------|----------------------------|----------------|------|
| LC-ESI-MS/MS                  | 25(OH)D3                                         | d-6<br>25(OH)D3                    | DBS        | 2.25-225          | LOD: 5                     | 10             | [26] |
| LC-API-MS/MS                  | 25(OH)D3<br>25(OH)D2                             | d-3<br>25(OH)D3<br>d-3<br>25(OH)D2 | Serum      | 2.5-100           | LLOQ: 2.5                  | 7              | [37] |
| LC-ESI-MS/MS                  | 25(OH)D3<br>25(OH)D2                             | d-6<br>25(OH)D3                    | Serum      | 1-100             | LLOQ: 1                    | 3              | [38] |
| LC-ESI-MS/MS<br>(This method) | 25(OH)D3<br>25(OH)D2<br>Vitamin D3<br>Vitamin D2 | d-6<br>25(OH)D3<br>d-3 vitamin D2  | DBS        | 0.78-200          | LLOQ: 0.78                 | 11             |      |

## References

26. Lote-Oke, Rashmi, Jwala Pawar, Shriram Kulkarni, Prasanna Sanas, Neha Kajale, Ketan Gondhalekar, Vaman Khadilkar, Siddhesh Kamat, and Anuradha Khadilkar. "A Lc–Ms Method for 25-Hydroxy-Vitamin D3 Measurements from Dried Blood Spots for an Epidemiological Survey in India." *Scientific Reports* 10, no. 1 (2020): 19873.
37. Zhang, Stanley, Wenying Jian, Sheryl Sullivan, Banu Sankaran, Richard W. Edom, Naidong Weng, and David Sharkey. "Development and Validation of an Lc–Ms/Ms Based Method for Quantification of 25 Hydroxyvitamin D2 and 25 Hydroxyvitamin D3 in Human Serum and Plasma." *Journal of Chromatography B* 961 (2014): 62-70.
38. Lee, S., J. H. Kim, S. A. Kim, Y. S. Sun, A. Lee, S. J. Park, Y. T. Kim, K. R. Lee, and Y. J. Kim. "A Rapid and Simple Liquid-Chromatography-Tandem Mass Spectrometry Method for Measuring 25-Hydroxyvitamin D2 and 25-Hydroxyvitamin D3 in Human Serum: Comparison with Two Automated Immunoassays." *Ann Clin Lab Sci* 46, no. 6 (2016): 645-53.
